# Supplementary material for: Synthesis of a derivative of α-D-Glcp(1->2)-D-Galf suitable for further glycosylation and of α-D-Glcp(1->2)-D-Gal, a disaccharide fragment obtained from varianose
Source: publisher site journal article supplement (doi:10.3762/bjoc.8.241), 2012-12-07
Supplement: Additional file 1 [file 1860-5397-8-241-S1.pdf]

**Supporting Information**  
for  
**Synthesis of a derivative of  $\alpha$ -D-Glcp(1→2)-D-Galf suitable  
for further glycosylation and of  $\alpha$ -D-Glcp(1→2)-D-Gal, a  
disaccharide fragment obtained from varianose**

Carla Marino<sup>1\*</sup>, Carlos Lima<sup>1</sup>, Karina Mariño<sup>1,2</sup> and Rosa M. de Lederkremer<sup>1</sup>

Address: <sup>1</sup>CIHIDECAR-CONICET-UBA, Departamento de Química Orgánica,  
Facultad de Ciencias Exactas y Naturales, UBA, Buenos Aires (1428), Argentina and  
<sup>2</sup>Laboratorio de Glicómica Funcional y Molecular, Instituto de Biología y Medicina  
Experimental (IBYME), CONICET, Buenos Aires (1428), Argentina

Email: Carla Marino\* - [cmarino@qo.fcen.uba.ar](mailto:cmarino@qo.fcen.uba.ar)

\*Corresponding author

**NMR spectra of compounds 1, 5, 7 and 8**

**Table of Contents**

|                                                         |    |
|---------------------------------------------------------|----|
| <sup>1</sup> H NMR spectrum of compound <b>5</b> .....  | S2 |
| <sup>13</sup> C NMR spectrum of compound <b>5</b> ..... | S3 |
| <sup>1</sup> H NMR spectrum of compound <b>7</b> .....  | S4 |
| <sup>13</sup> C NMR spectrum of compound <b>7</b> ..... | S5 |
| <sup>1</sup> H NMR spectrum of compound <b>8</b> .....  | S6 |
| <sup>13</sup> C NMR spectrum of compound <b>8</b> ..... | S7 |
| <sup>1</sup> H NMR spectrum of compound <b>1</b> .....  | S8 |
| <sup>13</sup> C NMR spectrum of compound <b>1</b> ..... | S9 |

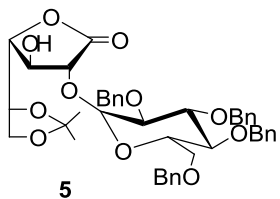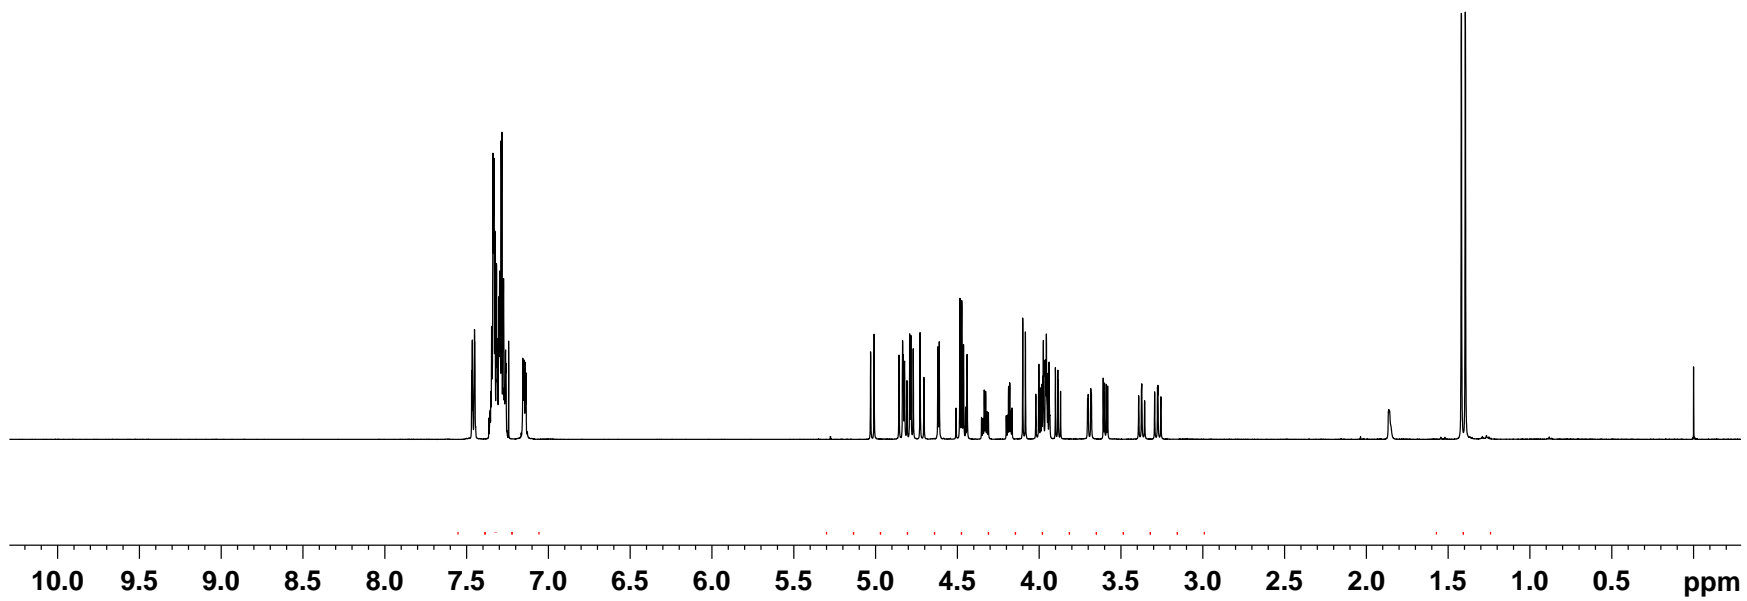

Figure S1:  $^1\text{H}$  NMR of compound 5.

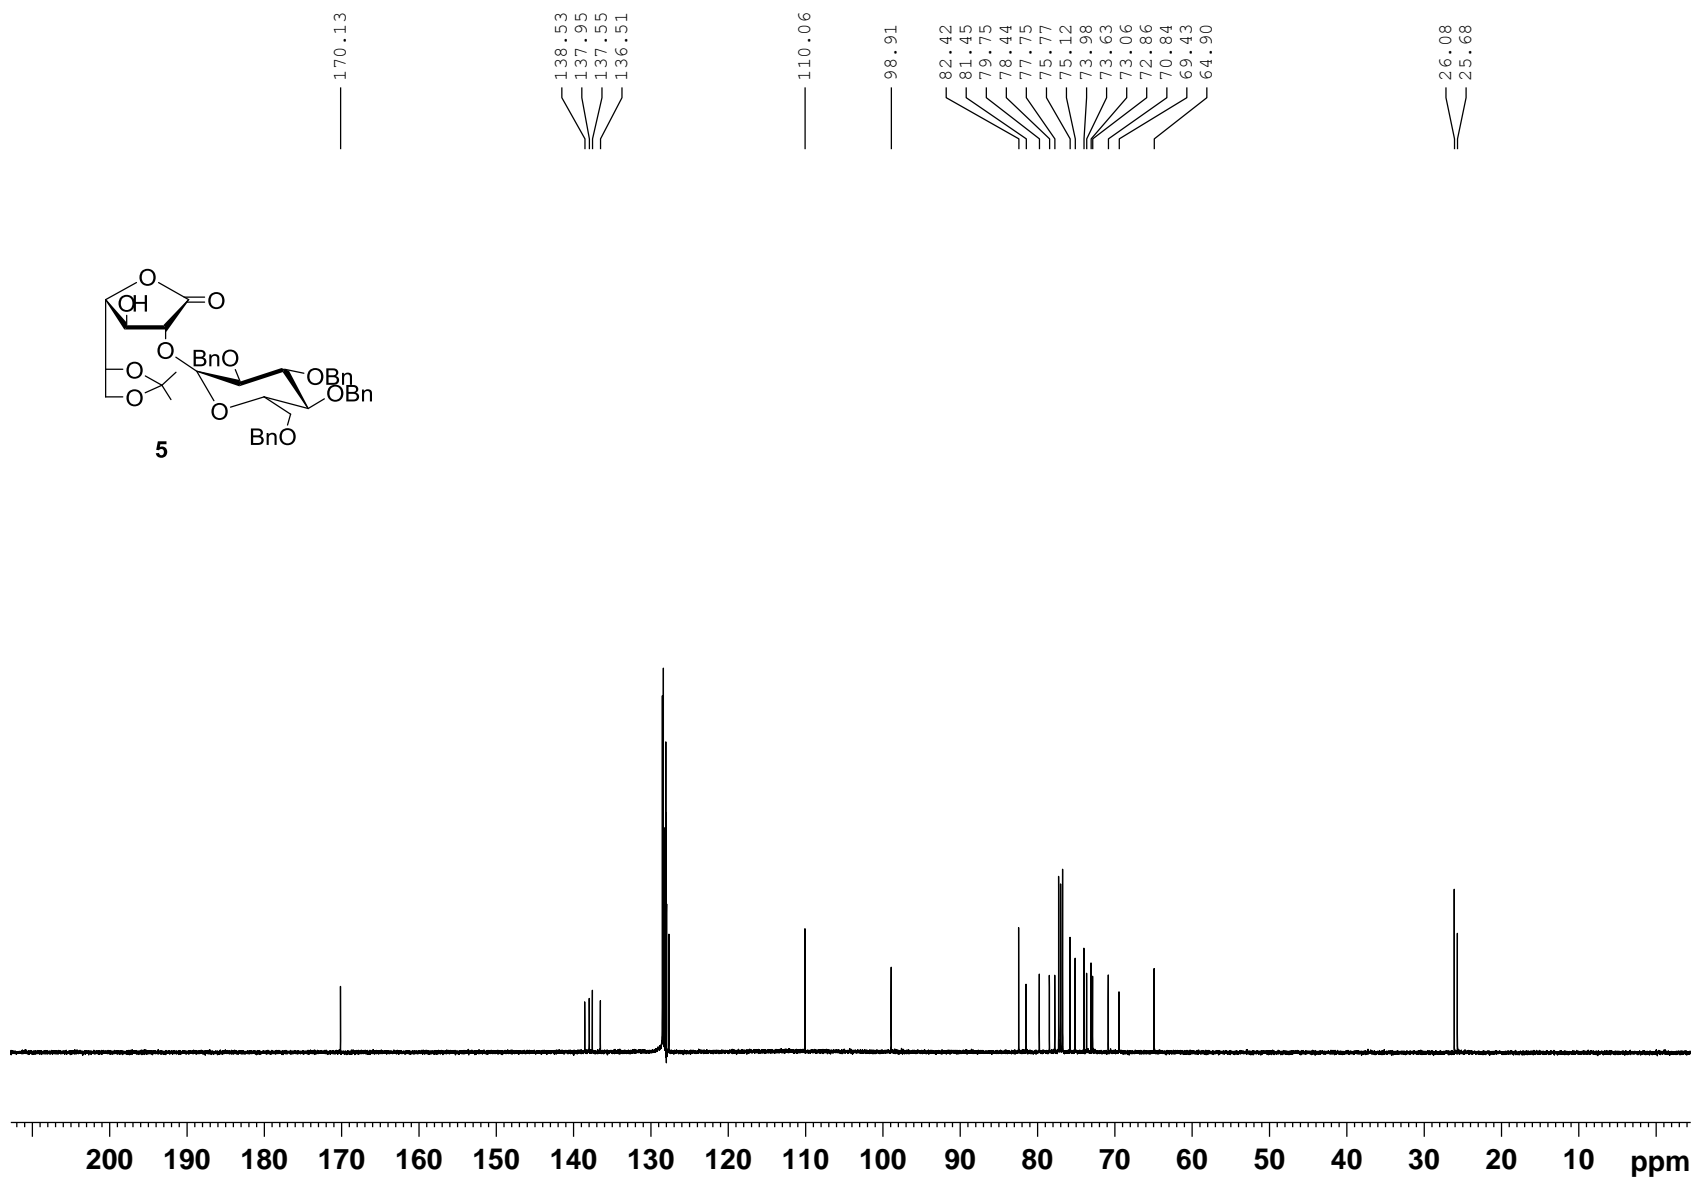

Figure S2:  $^{13}\text{C}$  NMR of compound 5.

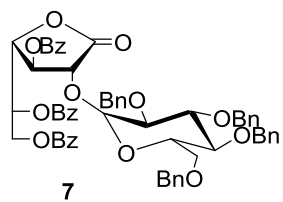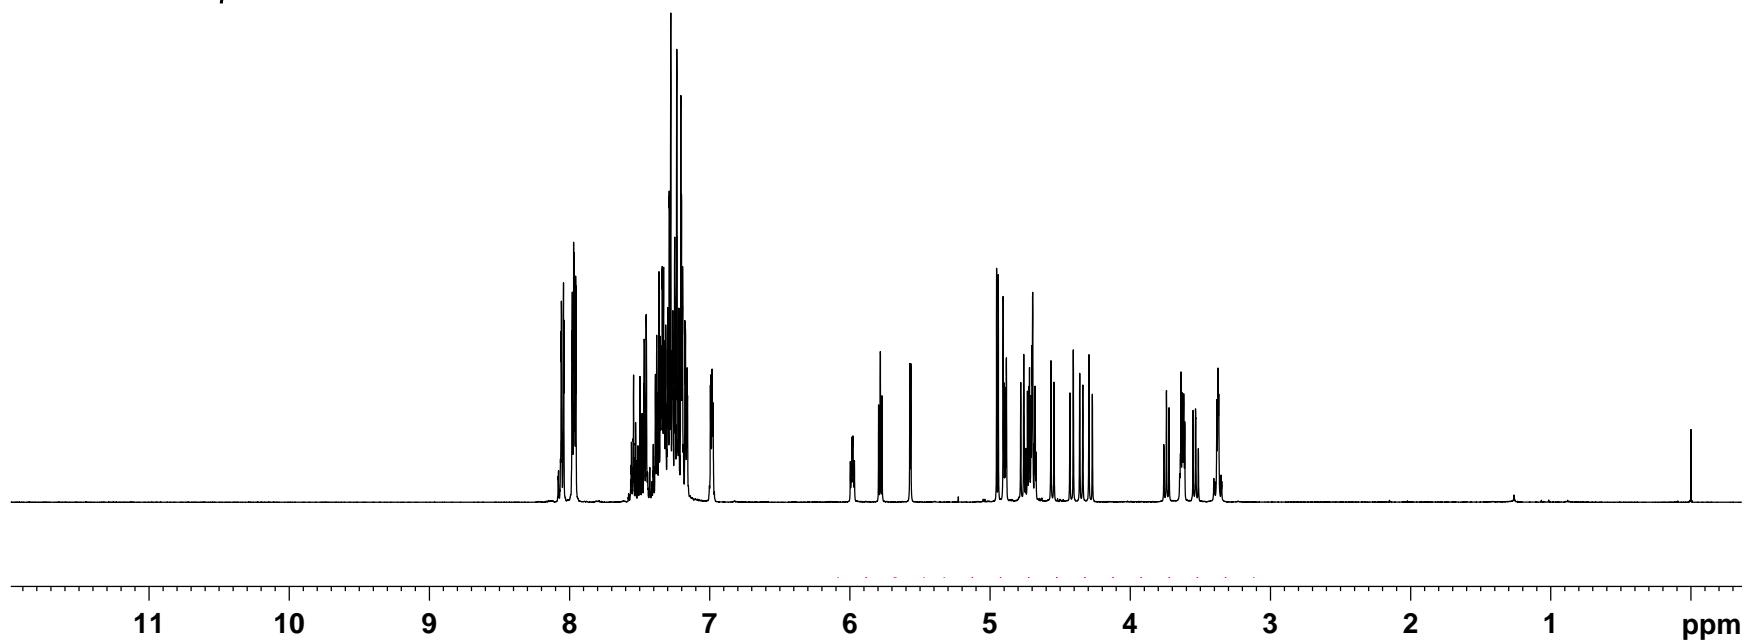

Figure S3:  $^1\text{H}$  NMR of compound 7.

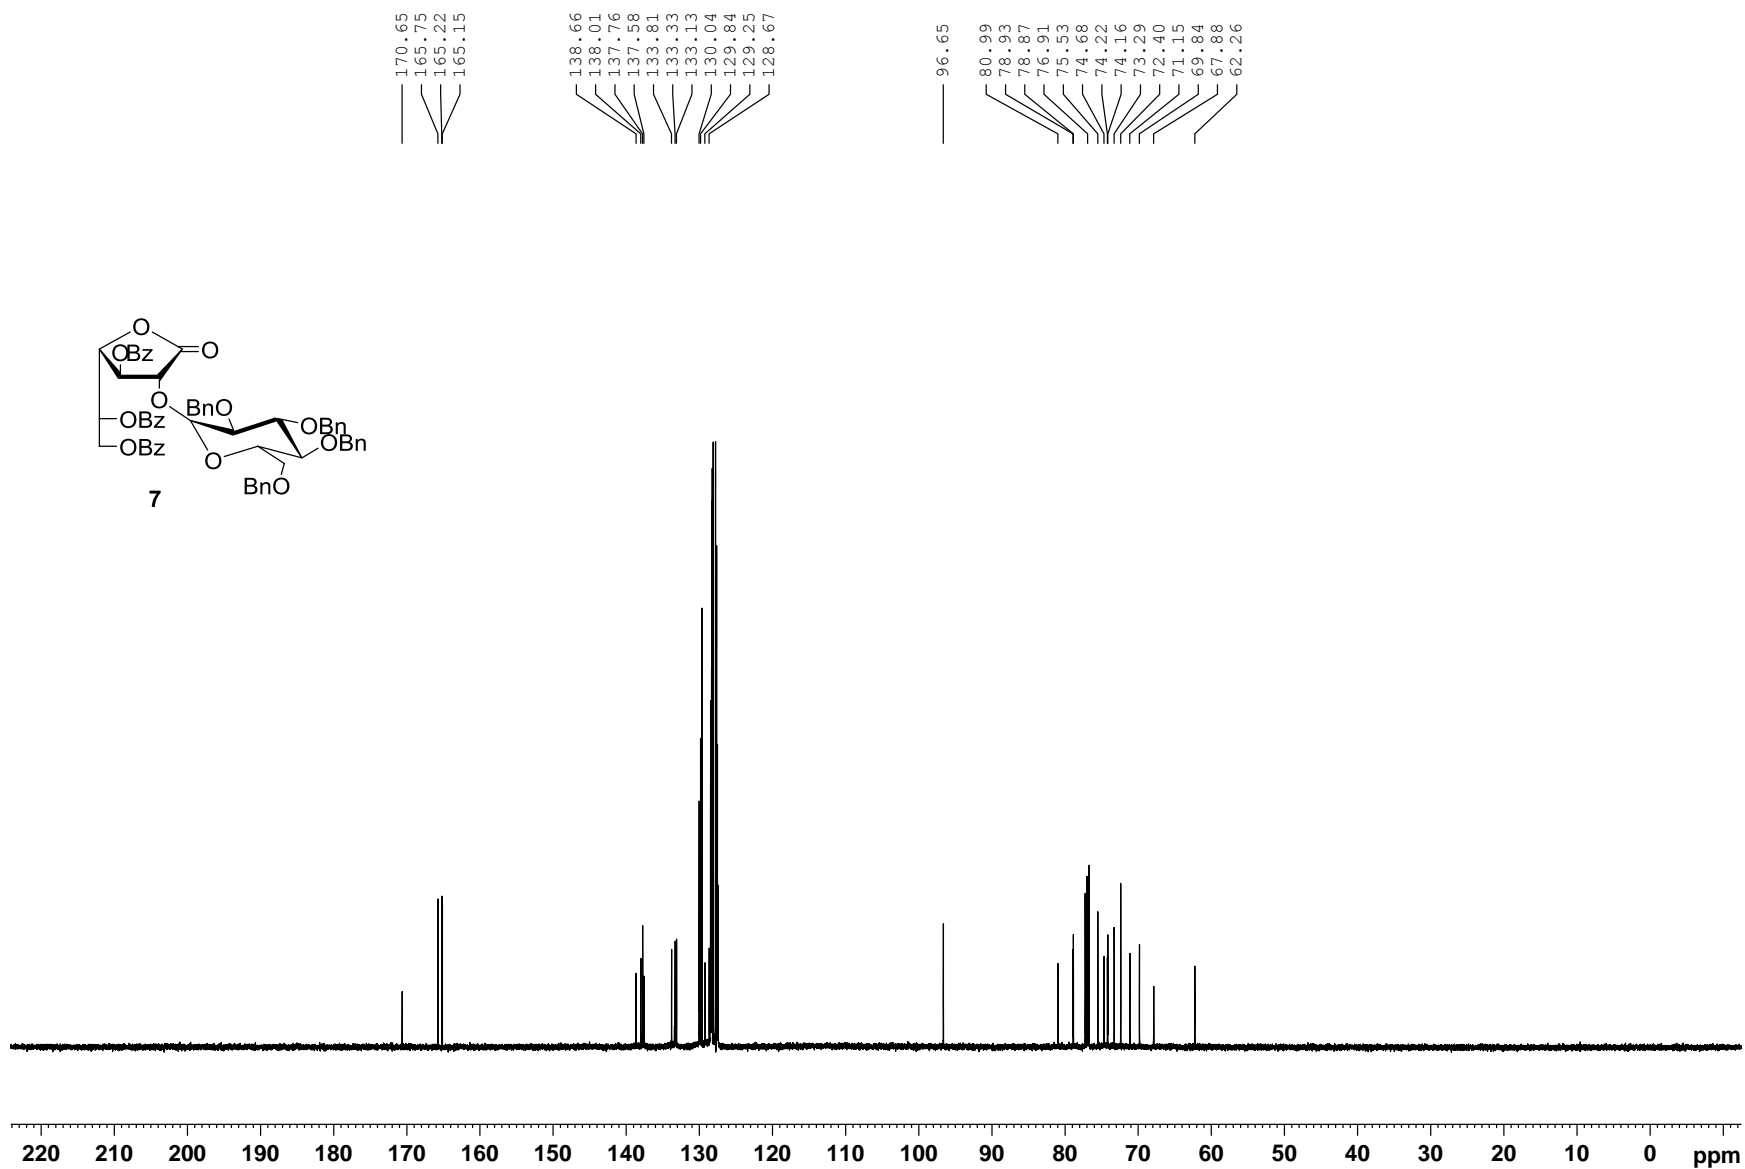

Figure S4:  $^{13}\text{C}$  NMR of compound 7.

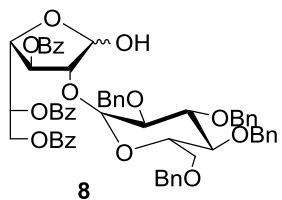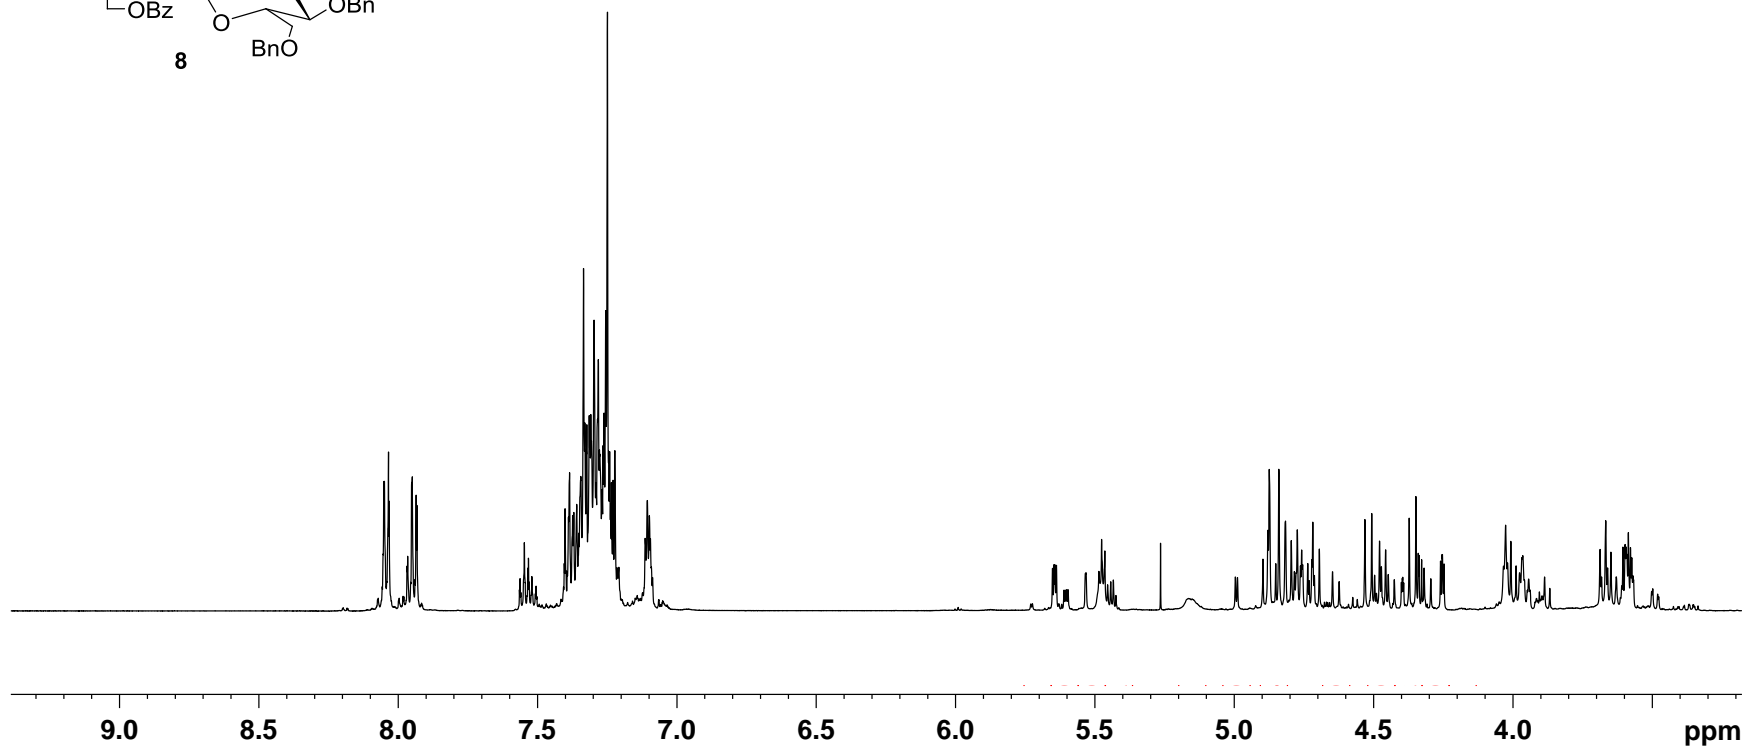

Figure S5:  $^1\text{H}$  NMR of compound **8**.

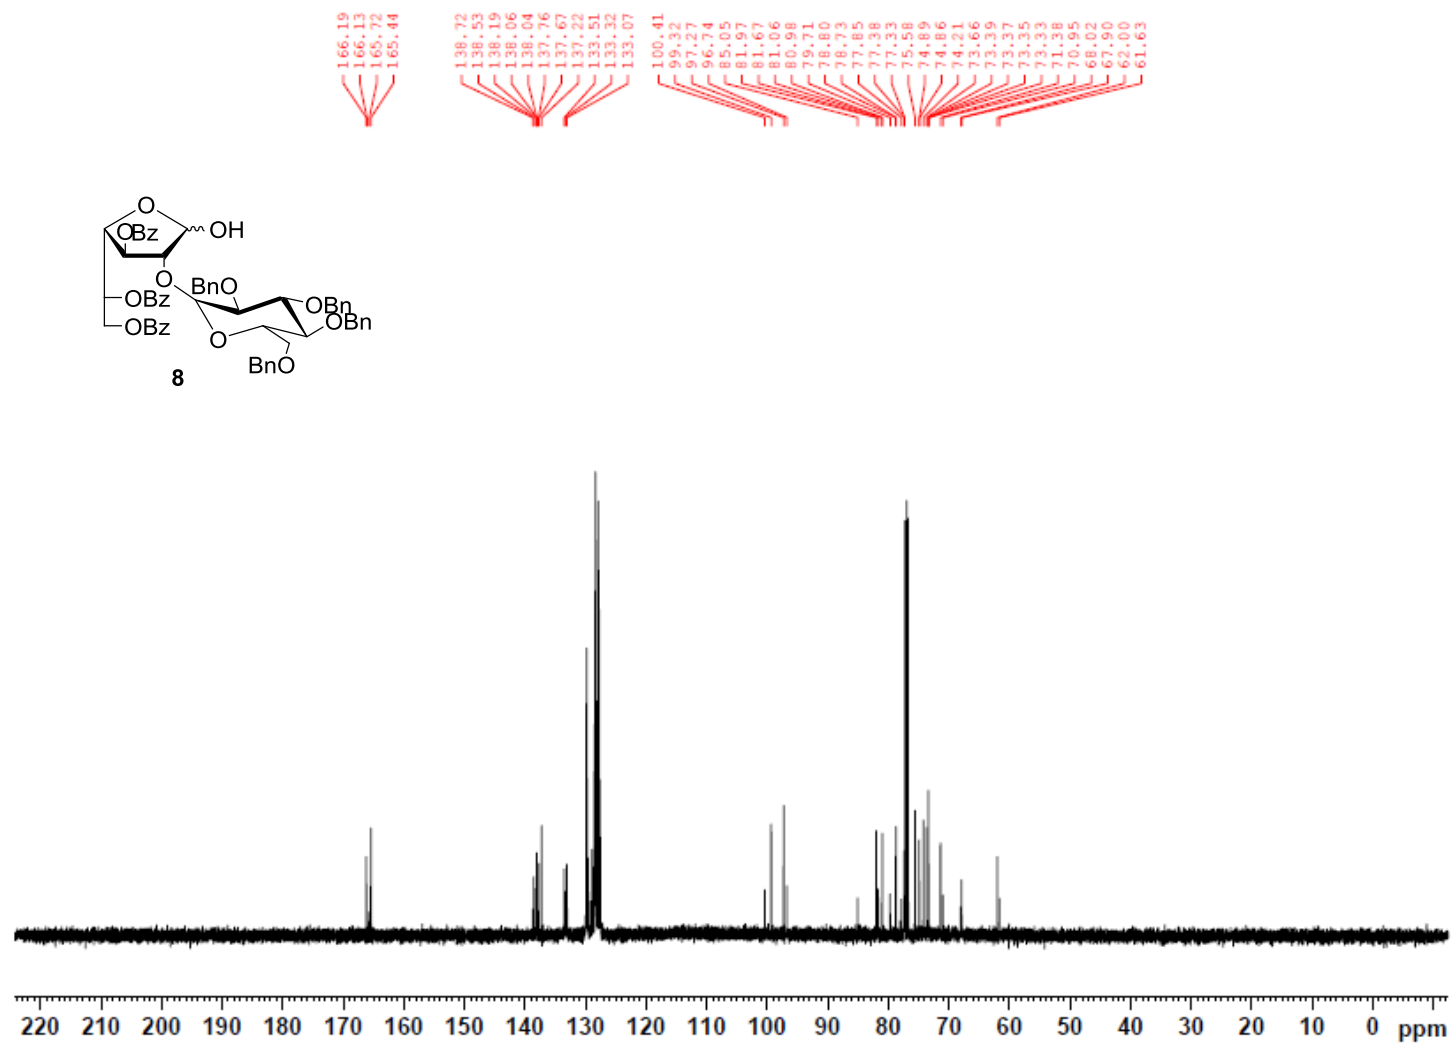

**Figure S6:**  $^{13}\text{C}$  NMR of compound **8**.

D-Glcp-( $\alpha$ 1,2)-D-Gal

**1**

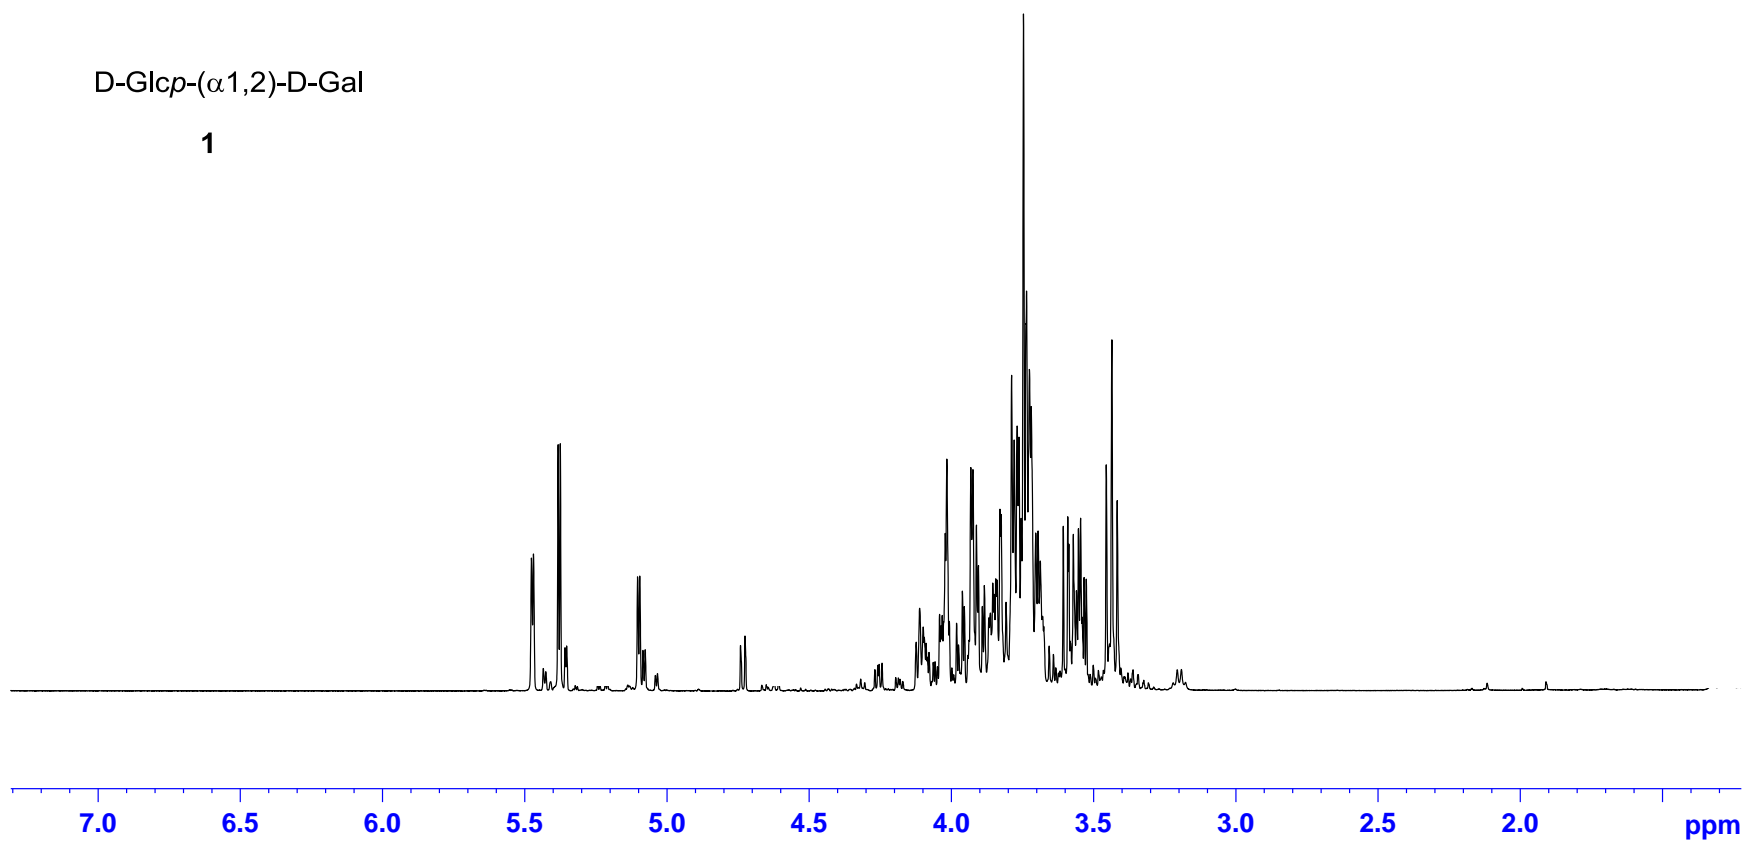

**Figure S7:**  $^1\text{H}$  NMR of compound **1**.



D-Glcp-( $\alpha$ 1,2)-D-Gal  
**1**

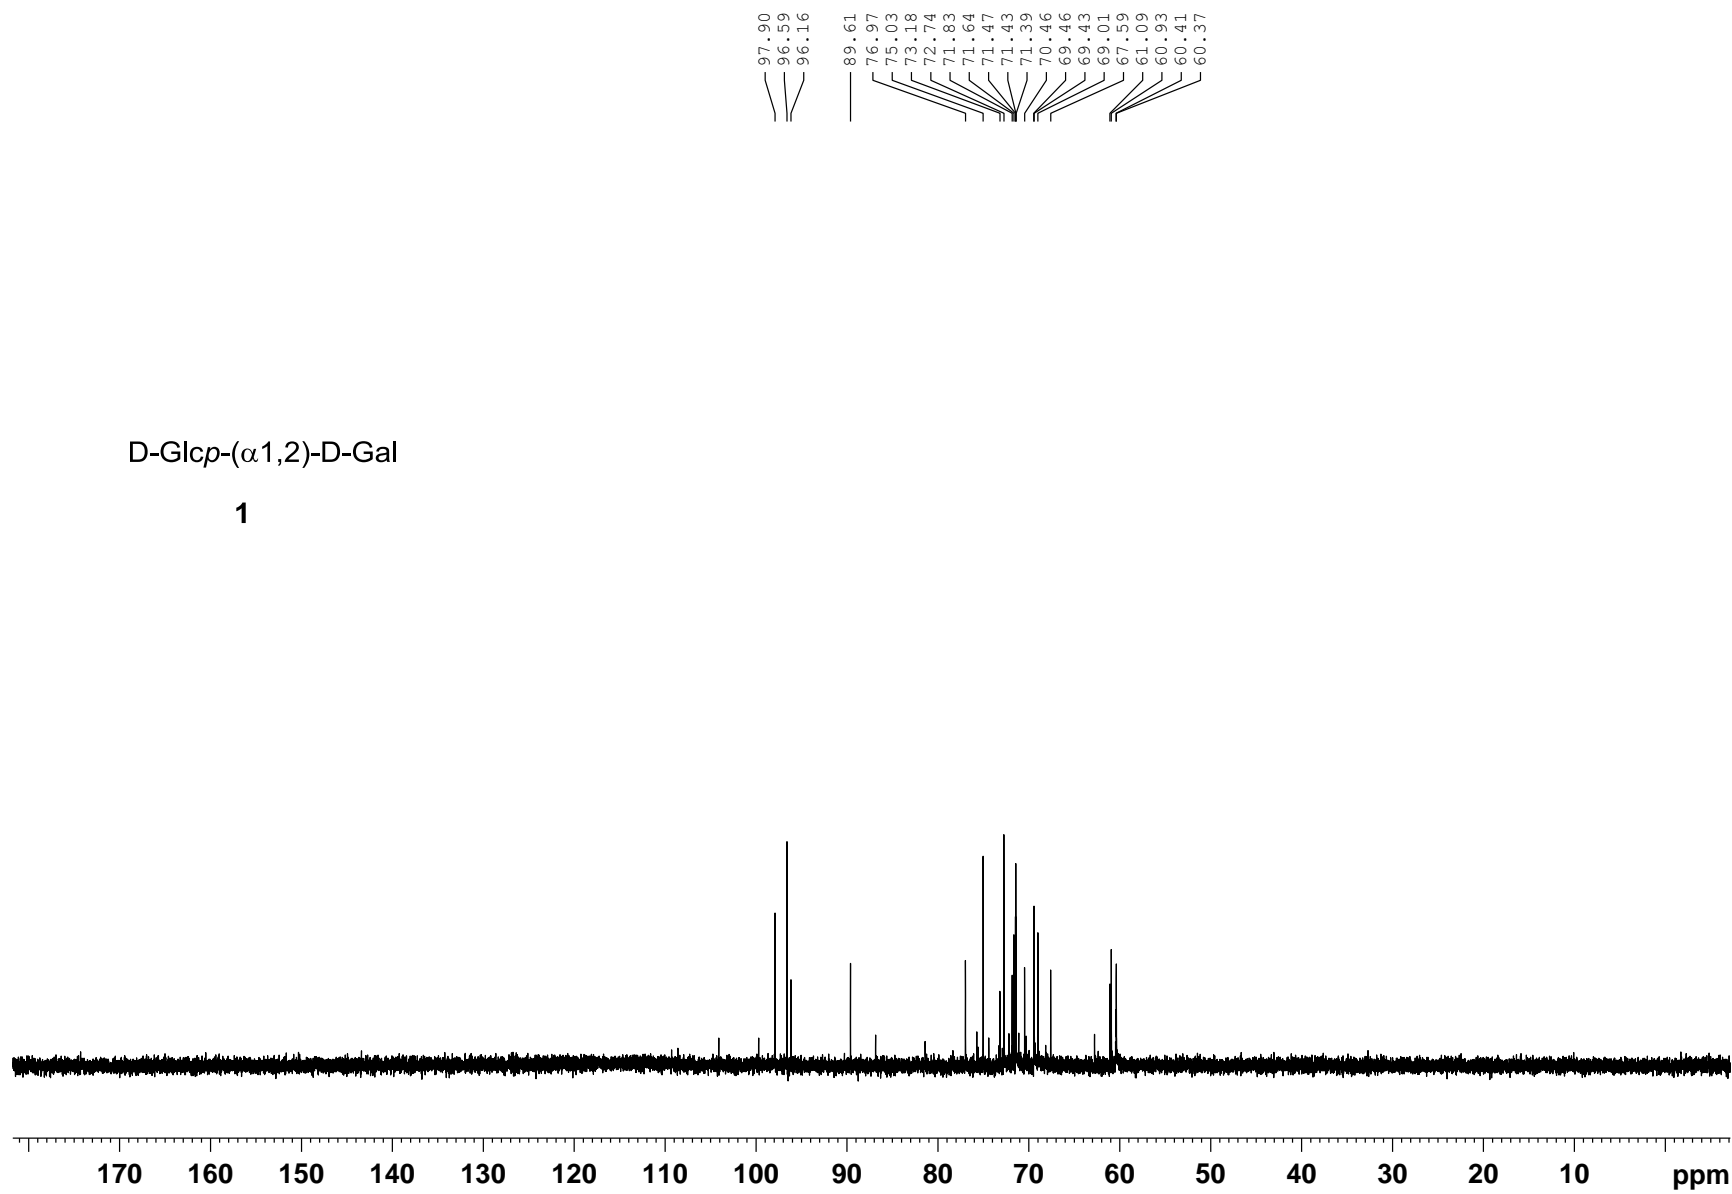

**Figure S8:**  $^{13}\text{C}$  NMR of compound **1**.
